# Supplementary material for: Electrode Based on the MWCNTs and Electropolymerized Thymolphthalein for the Voltammetric Determination of Total Isopropylmethylphenols in Spices
Source: MDPI journal article supplement (doi:10.3390/mi14030636), 2023-03-11
Supplement: s1 [file s1]

## Supplementary Materials

### Electrode Based on the MWCNTs and Electropolymerized Thymolphthalein for the Voltammetric Determination of Total Isopropylmethylphenols in Spices

Natalia Chernousova and Guzel Ziyatdinova\*

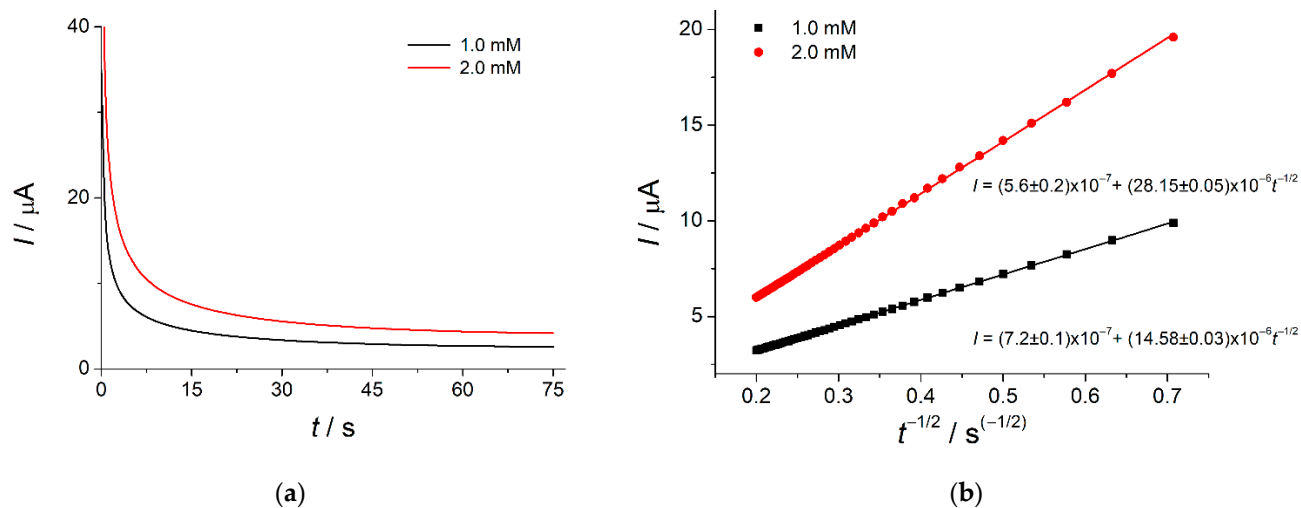

**Figure S1.** (a) Chronoamperometric curves of ferrocyanide ions in 0.1 M KCl at the bare GCE at 0.45 V; (b) Plot of  $I$  vs.  $t^{-1/2}$  on the basis of chronoamperometric data.

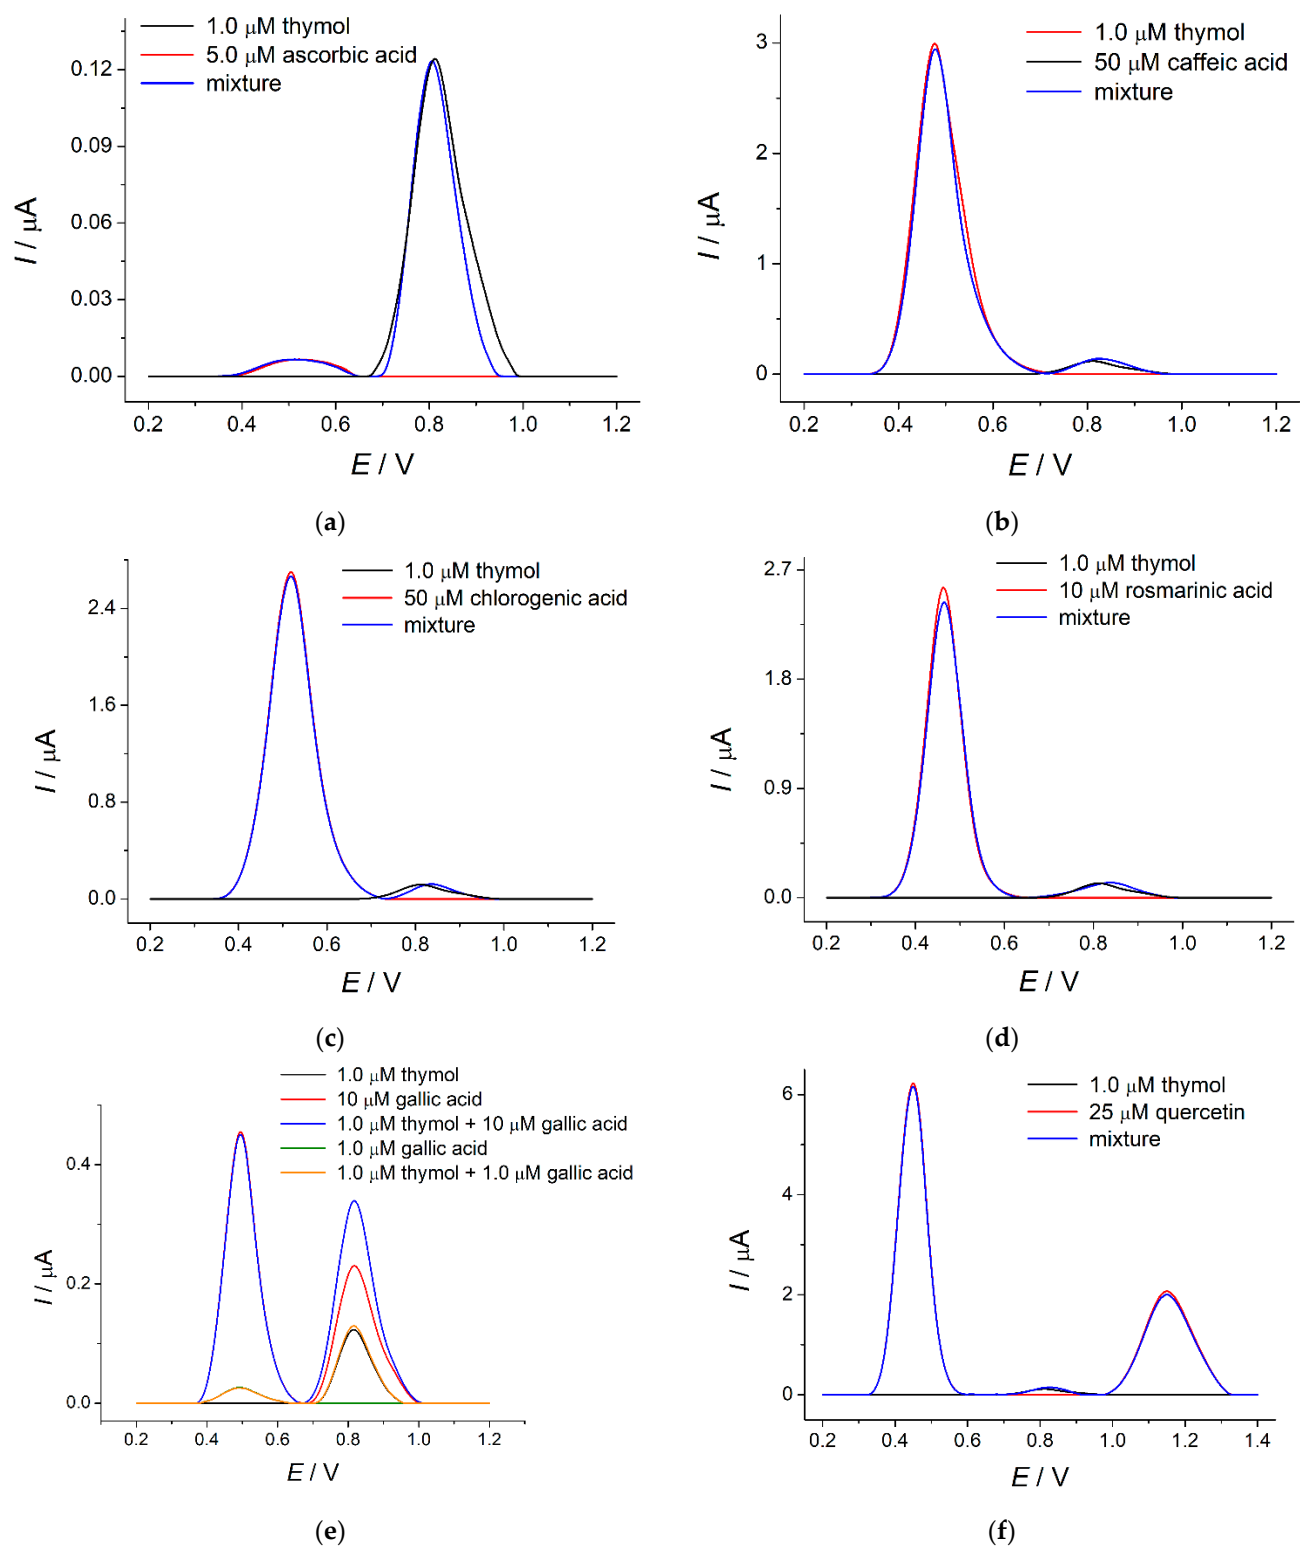

**Figure S2.** Effect of the ascorbic acid and natural phenolics on the voltammetric response of thymol at the polythymolphthalein/MWCNTs/GCE in Britton-Robinson buffer pH 2.0: (a) effect of 25  $\mu\text{M}$  ascorbic acid; (b) effect of 50  $\mu\text{M}$  caffeic acid; (c) effect of 50  $\mu\text{M}$  chlorogenic acid; (d) effect of 10  $\mu\text{M}$  rosmarinic acid; (e) effect of 10 and 1.0  $\mu\text{M}$  gallic acid; (f) effect of 25  $\mu\text{M}$  quercetin.  $\Delta E_{\text{mod}} = 100 \text{ mV}$ ,  $t_{\text{mod}} = 25 \text{ ms}$ ,  $v = 20 \text{ mV s}^{-1}$ .

**Table S1.** Recovery of total isopropylmethylphenols in spices extracts at the polythymolphthalein/MWCNTs/GCE in Britton–Robinson buffer pH 2.0 ( $n = 5$ ;  $P = 0.95$ ).

| Extract | Spiked ( $\mu\text{M}$ ) | Found ( $\mu\text{M}$ ) | RSD (%) | <i>R</i> (%)    |
|---------|--------------------------|-------------------------|---------|-----------------|
| Oregano | 0                        | $11 \pm 2$              | 3.0     |                 |
|         | 5.50                     | $16.6 \pm 0.5$          | 1.3     | $100 \pm 2$     |
|         | 11.0                     | $22.0 \pm 0.2$          | 3.4     | $99 \pm 3$      |
| Thyme   | 0                        | $6.5 \pm 0.3$           | 1.8     |                 |
|         | 3.25                     | $9.78 \pm 0.03$         | 0.17    | $100.5 \pm 0.6$ |
|         | 6.50                     | $13.1 \pm 0.2$          | 0.76    | $101 \pm 2$     |
